# Supplementary material
Source: HighWire-hosted journal article supplement (http://thorax.bmjjournals.com/highwire/filestream/173979/field_highwire_adjunct_files/1/2_COPD_MiRNA_Supplemental_Figures_71911.2.pdf)
Supplement: 2_COPD_MiRNA_Supplemental_Figures_71911.2.pdf [file 2_COPD_MiRNA_Supplemental_Figures_71911.2.pdf]

**SUPPLEMENTAL TABLE E4: PATHWAYS ENRICHED BY DIFFERENTIALLY EXPRESSED GENES OBTAINED FROM KEGG DATABASE**

|                            |                          |                                                           | DEGs<br>(2667 genes) | PicTar<br>(3583<br>genes) | PicTar<br>DEGs<br>(635<br>genes) | TargetScan<br>(6270<br>genes) | TargetScan<br>DEGs<br>(1100 genes) | miRanda<br>(10380<br>genes) | miRanda<br>DEGs<br>(1633 genes) |
|----------------------------|--------------------------|-----------------------------------------------------------|----------------------|---------------------------|----------------------------------|-------------------------------|------------------------------------|-----------------------------|---------------------------------|
| Metabolism                 | Amino Acid<br>Metabolism | Alanine, aspartate and<br>glutamate metabolism            | 0.311661             | 0.967572538               | NA                               | 0.47092323                    | 0.61386779                         | 0.38364646                  | 0.17307242                      |
|                            |                          | Arginine and proline<br>metabolism                        | 0.5440286            | 0.99070845                | NA                               | 0.99405651                    | 0.87232242                         | 0.39185541                  | 0.40367693                      |
|                            |                          | Cysteine and methionine<br>metabolism                     | 0.0226454            | 0.724187326               | 0.1384449                        | 0.33390341                    | 0.02157677                         | 0.22261954                  | 0.00387908                      |
|                            |                          | Glycine, serine and<br>threonine metabolism               | 0.1685336            | 0.967572538               | NA                               | 0.99994701                    | NA                                 | 0.99539665                  | 0.58587139                      |
|                            |                          | Histidine metabolism                                      | 0.828963             | 0.998723204               | NA                               | 0.99988708                    | NA                                 | 0.99888516                  | 0.94750356                      |
|                            |                          | Lysine biosynthesis                                       | NA                   | NA                        | NA                               | NA                            | NA                                 | 0.95437001                  | NA                              |
|                            |                          | Lysine degradation                                        | 0.9694503            | 0.279442764               | 0.8207449                        | 0.51981425                    | 0.95033785                         | 0.63836825                  | 0.98864747                      |
|                            |                          | Phenylalanine<br>metabolism                               | 0.6579092            | 0.993597504               | NA                               | 0.99101413                    | NA                                 | 0.71615537                  | 0.64050278                      |
|                            |                          | Phenylalanine, tyrosine<br>and tryptophan<br>biosynthesis | 0.554005             | NA                        | NA                               | NA                            | NA                                 | 0.23798992                  | 0.39760458                      |
|                            |                          | Tryptophan metabolism                                     | 0.5615356            | 0.999899177               | NA                               | 0.99998245                    | 0.93467876                         | 0.99933977                  | 0.54701739                      |
|                            |                          | Tyrosine metabolism                                       | 0.6586066            | 0.99996001                | NA                               | 0.99999964                    | NA                                 | 0.99346333                  | 0.81071553                      |
|                            |                          | Valine, leucine and<br>isoleucine biosynthesis            | 0.5044228            | NA                        | NA                               | NA                            | NA                                 | 0.98190599                  | NA                              |
|                            |                          | Valine, leucine and<br>isoleucine degradation             | 0.3296825            | 0.999502194               | NA                               | 0.99996943                    | NA                                 | 0.89644917                  | 0.62444521                      |
| Carbohydrate<br>Metabolism |                          | Amino sugar and<br>nucleotide sugar<br>metabolism         | 0.1091182            | 0.825790271               | NA                               | 0.51981425                    | 0.32703908                         | 0.83119358                  | 0.24611359                      |
|                            |                          | Ascorbate and aldarate<br>metabolism                      | NA                   | NA                        | NA                               | 0.99902343                    | NA                                 | 0.99995916                  | NA                              |
|                            |                          | Butanoate metabolism                                      | NA                   | 0.99604096                | NA                               | 0.9991281                     | NA                                 | 0.97706541                  | NA                              |
|                            |                          | Citrate cycle (TCA cycle)                                 | 0.9572843            | 0.90467567                | NA                               | 0.75808056                    | NA                                 | 0.52586002                  | 0.95718673                      |
|                            |                          | Fructose and mannose<br>metabolism                        | 0.3965896            | 0.724187326               | NA                               | 0.47266398                    | 0.66443182                         | 0.73112245                  | 0.64975546                      |
|                            |                          | Galactose metabolism                                      | 0.1806852            | 0.446612567               | NA                               | 0.91218998                    | 0.82982813                         | 0.42075739                  | 0.46438499                      |
|                            |                          | Glycolysis /<br>Gluconeogenesis                           | 0.2757824            | 0.999865207               | NA                               | 0.99997689                    | 0.91273671                         | 0.96071094                  | 0.69914125                      |
|                            |                          | Glyoxylate and<br>dicarboxylate metabolism                | 0.678253             | NA                        | NA                               | 0.92209013                    | NA                                 | 0.99181871                  | 0.78174703                      |
|                            |                          | Inositol phosphate<br>metabolism                          | 0.8363935            | 0.123125493               | 0.8789738                        | 0.05924525                    | 0.1407672                          | 0.06587983                  | 0.60580608                      |

|                                    |                                                       |           |             |            |            |            |            |            |
|------------------------------------|-------------------------------------------------------|-----------|-------------|------------|------------|------------|------------|------------|
|                                    | Pentose and glucuronate interconversions              | NA        | NA          | NA         | 0.99935101 | NA         | 0.97659144 | NA         |
|                                    | Pentose phosphate pathway                             | 0.5239334 | 0.996790886 | NA         | 0.99665347 | 0.49595759 | 0.49267581 | 0.70962248 |
|                                    | Propanoate metabolism                                 | 0.8761501 | 0.994054055 | NA         | 0.99969581 | NA         | 0.99709965 | NA         |
|                                    | Pyruvate metabolism                                   | 0.5615356 | 0.999899177 | NA         | 0.99999832 | NA         | 0.9720779  | 0.9094099  |
|                                    | Starch and sucrose metabolism                         | 0.8913046 | 0.995549632 | NA         | 0.9955899  | 0.77340283 | 0.89753227 | 0.78461105 |
| Energy Metabolism                  | Methane metabolism                                    | 0.2212647 | NA          | NA         | 0.65090358 | NA         | 0.72406742 | 0.45570965 |
|                                    | Nitrogen metabolism                                   | 0.6882821 | 0.878537841 | NA         | 0.52347571 | 0.79114736 | 0.186068   | 0.38453636 |
|                                    | Oxidative phosphorylation                             | 0.9984703 | 0.999999999 | NA         | 0.99999998 | 0.99987029 | 0.99999342 | 0.99999841 |
|                                    | Sulfur metabolism                                     | 0.8561989 | NA          | NA         | NA         | NA         | 0.95723606 | 0.7039721  |
| Glycan Biosyntheses and Metabolism | Chondroitin sulfate biosynthesis                      | 0.9715394 | 0.858240226 | NA         | 0.29611107 | NA         | 0.38909151 | 0.89290476 |
|                                    | Glycosaminoglycan degradation                         | 0.9665294 | 0.948157826 | NA         | 0.98759598 | NA         | 0.98261375 | NA         |
|                                    | Glycosylphosphatidylinositol(GPI)-anchor biosynthesis | 0.905463  | 0.996790886 | NA         | 0.95514373 | NA         | 0.943536   | 0.70962248 |
|                                    | Heparan sulfate biosynthesis                          | NA        | 0.272583491 | NA         | 0.0093115  | NA         | 0.42075739 | NA         |
|                                    | Keratan sulfate biosynthesis                          | 0.3482235 | 0.318017913 | NA         | 0.31285447 | 0.61419341 | 0.01345136 | 0.14582827 |
|                                    | N-Glycan biosynthesis                                 | 0.5398948 | 0.473567596 | 0.8342778  | 0.89028684 | NA         | 0.52892882 | 0.45951626 |
|                                    | O-Glycan biosynthesis                                 | 0.673976  | 0.418463643 | 0.6897429  | 0.27953146 | 0.59576837 | 0.05263959 | 0.32672083 |
|                                    | O-Mannosyl glycan biosynthesis                        | NA        | NA          | NA         | NA         | NA         | 0.90123868 | NA         |
|                                    | Other glycan degradation                              | 0.0770167 | NA          | NA         | NA         | NA         | 0.98100943 | 0.80284051 |
| Lipid Metabolism                   | alpha-Linolenic acid metabolism                       | 0.9455708 | 0.983930923 | NA         | 0.99345461 | NA         | 0.9934561  | NA         |
|                                    | Arachidonic acid metabolism                           | 0.6100163 | 0.999701117 | NA         | 0.99999686 | 0.97820527 | 0.99915603 | 0.97659095 |
|                                    | Biosynthesis of unsaturated fatty acids               | 0.9715394 | 0.479570702 | NA         | 0.64207289 | 0.77639651 | 0.71615537 | 0.89290476 |
|                                    | Ether lipid metabolism                                | 0.614037  | 0.87192699  | NA         | 0.52086642 | 0.90801792 | 0.7850852  | 0.86448595 |
|                                    | Fatty acid biosynthesis                               | NA        | NA          | NA         | 0.9131115  | NA         | 0.92220498 | NA         |
|                                    | Fatty acid elongation in mitochondria                 | NA        | NA          | NA         | NA         | NA         | 0.8996091  | NA         |
|                                    | Fatty acid metabolism                                 | 0.5615356 | 0.856599141 | NA         | 0.99766071 | NA         | 0.99802643 | 0.9094099  |
|                                    | Glycerolipid metabolism                               | 0.92      | 0.92230455  | NA         | 0.68298814 | 0.9536283  | 0.86632623 | 0.98975097 |
|                                    | Glycerophospholipid metabolism                        | 0.9525307 | 0.539144792 | NA         | 0.16461694 | 0.83396318 | 0.31844826 | 0.90490466 |
|                                    | Linoleic acid metabolism                              | 0.6181022 | NA          | NA         | 0.99998916 | NA         | 0.99952295 | NA         |
| Primary bile acid biosynthesis     | NA                                                    | NA        | NA          | 0.94184237 | NA         | 0.52297924 | NA         |            |

|                                |                                           |                                              |           |             |           |            |            |            |            |
|--------------------------------|-------------------------------------------|----------------------------------------------|-----------|-------------|-----------|------------|------------|------------|------------|
|                                |                                           | Sphingolipid metabolism                      | 0.7110419 | 0.713702036 | NA        | 0.19931078 | 0.73671383 | 0.92501936 | 0.90171955 |
|                                |                                           | Steroid biosynthesis                         | NA        | NA          | NA        | 0.99064624 | NA         | 0.96238054 | NA         |
|                                |                                           | Steroid hormone biosynthesis                 | 0.9279369 | 0.999974822 | NA        | 0.99991178 | 0.95670135 | 0.99283973 | 0.9907474  |
|                                |                                           | Synthesis and degradation of ketone bodies   | NA        | NA          | NA        | NA         | NA         | 0.81463094 | NA         |
|                                | Metabolism of Cofactors and Vitamins      | Folate biosynthesis                          | 0.8309438 | NA          | NA        | NA         | NA         | 0.80398918 | NA         |
|                                |                                           | Nicotinate and nicotinamide metabolism       | NA        | 0.970857003 | NA        | 0.86453326 | NA         | 0.71842558 | NA         |
|                                |                                           | One carbon pool by folate                    | 0.0770167 | NA          | NA        | 0.83649711 | 0.28347395 | 0.94065479 | 0.19514931 |
|                                |                                           | Pantothenate and CoA biosynthesis            | 0.911516  | 0.967974979 | NA        | 0.79343415 | NA         | 0.41370945 | NA         |
|                                |                                           | Porphyrin and chlorophyll metabolism         | 0.3681382 | NA          | NA        | 0.99997524 | 0.89453214 | 0.99947459 | 0.62926795 |
|                                |                                           | Retinol metabolism                           | 0.5665434 | 0.999556534 | 0.8789738 | 0.99831155 | 0.9749951  | 0.99925923 | 0.90437227 |
|                                |                                           | Riboflavin metabolism                        | 0.7130814 | NA          | NA        | 0.94184237 | 0.66334649 | 0.94065479 | 0.4653448  |
|                                |                                           | Thiamine metabolism                          | 0.3398706 | NA          | NA        | 0.26053334 | 0.41952396 | 0.8996091  | 0.17604164 |
|                                |                                           | Vitamin B6 metabolism                        | NA        | NA          | NA        | NA         | NA         | 0.92220498 | NA         |
|                                | Metabolism of Other Amino Acids           | beta-Alanine metabolism                      | 0.4199366 | 0.993597504 | NA        | 0.99846762 | NA         | 0.98921265 | 0.89290476 |
|                                |                                           | Cyanoamino acid metabolism                   | NA        | NA          | NA        | NA         | NA         | 0.95882864 | NA         |
|                                |                                           | D-Glutamine and D-glutamate metabolism       | 0.4758037 | 0.188032749 | NA        | 0.40915597 | NA         | 0.37094314 | 0.33331058 |
|                                |                                           | Glutathione metabolism                       | 0.3245158 | 0.995585114 | NA        | 0.99988324 | 0.96709221 | 0.75192869 | 0.87348682 |
|                                |                                           | Selenoamino acid metabolism                  | 0.0805838 | 0.446612567 | 0.0747107 | 0.91218998 | 0.24178987 | 0.72083153 | 0.2375278  |
|                                |                                           | Taurine and hypotaurine metabolism           | 0.80126   | 0.899025627 | NA        | 0.70338694 | NA         | 0.24035684 | NA         |
|                                | Metabolism of Terpenoids and Polyketides  | Limonene and pinene degradation              | NA        | 0.959702511 | NA        | 0.99667466 | NA         | 0.98557335 | NA         |
|                                |                                           | Terpenoid backbone biosynthesis              | NA        | 0.967974979 | NA        | 0.92209013 | NA         | 0.90831268 | NA         |
|                                | Nucleotide Metabolism                     | Purine metabolism                            | 0.9942811 | 0.999728592 | NA        | 0.99238311 | 0.99233476 | 0.73250191 | 0.99940274 |
|                                |                                           | Pyrimidine metabolism                        | 0.9992145 | 0.999893832 | NA        | 0.99947546 | 0.98844901 | 0.96243364 | 0.99993998 |
|                                | Xenobiotics Biodegradation and Metabolism | Metabolism of xenobiotics by cytochrome P450 | 0.2757824 | NA          | NA        | 1          | NA         | 0.99999993 | 0.98350292 |
| Genetic Information Processing | Folding, Sorting and Degradation          | Proteasome                                   | 0.9954466 | 0.992575817 | NA        | 0.99993632 | 0.95957131 | 0.91936905 | 0.99164714 |
|                                |                                           | RNA degradation                              | 0.3402992 | 0.757960461 | NA        | 0.66506391 | 0.89714571 | 0.98521611 | 0.99700056 |
|                                |                                           | SNARE interactions in vesicular transport    | 0.9978842 | 0.00193665  | NA        | 0.02497689 | 0.92509131 | 0.09106122 | NA         |

|                                      |                                     |                                         |             |             |            |            |            |            |            |
|--------------------------------------|-------------------------------------|-----------------------------------------|-------------|-------------|------------|------------|------------|------------|------------|
|                                      |                                     | Ubiquitin mediated proteolysis          | 0.2997347   | 0.002805588 | 0.2676058  | 2.483E-05  | 0.28790931 | 2.2676E-06 | 0.10664352 |
|                                      | Replication and Repair              | Base excision repair                    | 0.787815    | 0.996773151 | NA         | 0.97381745 | NA         | 0.99376278 | 0.9715315  |
|                                      |                                     | DNA replication                         | 0.4531702   | NA          | NA         | 0.99954654 | 0.91410148 | 0.97531258 | 0.87485135 |
|                                      |                                     | Homologous recombination                | NA          | NA          | NA         | 0.99998916 | NA         | 0.95833912 | NA         |
|                                      |                                     | Mismatch repair                         | 0.8777988   | NA          | NA         | 0.69395916 | 0.79114736 | 0.78321633 | NA         |
|                                      |                                     | Non-homologous end-joining              | NA          | NA          | NA         | 0.99499818 | NA         | 0.99468494 | NA         |
|                                      |                                     | Nucleotide excision repair              | 0.9112891   | 0.962950953 | NA         | 0.91458303 | 0.79531769 | 0.96919545 | 0.93487758 |
|                                      | Transcription                       | Basal transcription factors             | 0.9965532   | 0.428206219 | NA         | 0.66079094 | NA         | 0.67398541 | 0.9715315  |
|                                      |                                     | RNA polymerase                          | 0.98925     | NA          | NA         | 0.99878576 | NA         | 0.91153755 | NA         |
|                                      |                                     | Spliceosome                             | 0.172141    | 0.88373349  | 0.5296777  | 0.54351042 | 0.59283554 | 0.30974005 | 0.22961395 |
|                                      | Translation                         | Aminoacyl-tRNA biosynthesis             | 0.0740458   | 0.999919981 | NA         | 0.99956327 | NA         | 0.99650021 | 0.91653449 |
|                                      |                                     | Ribosome                                | 0.0285019   | 0.999999998 | NA         | 1          | NA         | 1          | 0.99252332 |
| Environmental Information Processing | Membrane Transport                  | ABC transporters                        | 0.8062986   | 0.279442764 | NA         | 0.75796166 | 0.95033785 | 0.96919545 | 0.81071553 |
|                                      |                                     | Protein export                          | 0.3398706   | NA          | NA         | 0.80672925 | 0.41952396 | 0.4482186  | 0.17604164 |
|                                      | Signal Transduction                 | Calcium signaling pathway               | 0.7168691   | 0.016803733 | 0.0356407  | 0.00383646 | 0.17899261 | 0.02337471 | 0.53465037 |
|                                      |                                     | ErbB signaling pathway                  | 0.2168246   | 0.000119414 | 0.2372793  | 1.046E-06  | 0.21035646 | 0.0005804  | 0.32687001 |
|                                      |                                     | Hedgehog signaling pathway              | 0.6100163   | 0.155800837 | 0.8881285  | 0.00332365 | 0.97820527 | 0.01100783 | 0.45694259 |
|                                      |                                     | Jak-STAT signaling pathway              | 0.2857191   | 0.041090108 | 0.3791778  | 0.06794411 | 0.1382218  | 0.00135203 | 0.23380411 |
|                                      |                                     | MAPK signaling pathway                  | 0.0892441   | 8.01592E-13 | 0.0001752  | 1.869E-13  | 0.02643733 | 2.2419E-06 | 0.02222242 |
|                                      |                                     | mTOR signaling pathway                  | 0.5210647   | 0.161434765 | 0.5961856  | 0.00026373 | 0.25422383 | 0.05964617 | 0.75208755 |
|                                      |                                     | Notch signaling pathway                 | 0.0807335   | 0.043288559 | 0.2660992  | 0.0015783  | 0.08501119 | 0.00033012 | 0.16179571 |
|                                      |                                     | Phosphatidylinositol signaling system   | 0.7941028   | 0.010211541 | 0.5412452  | 0.00450758 | 0.11041484 | 0.0195404  | 0.42168818 |
|                                      |                                     | TGF-beta signaling pathway              | 0.0148621   | 2.0855E-07  | 9.704E-05  | 9.7057E-09 | 0.00141885 | 5.2799E-06 | 0.00335242 |
|                                      |                                     | VEGF signaling pathway                  | 0.1398929   | 0.072614661 | 0.1570074  | 0.01129742 | 0.1169664  | 0.22987649 | 0.43686868 |
|                                      | Wnt signaling pathway               | 0.3150003                               | 1.43633E-11 | 0.1216808   | 1.4779E-14 | 0.00434116 | 7.7884E-10 | 0.03101041 |            |
|                                      | Signaling Molecules and Interaction | Cell adhesion molecules (CAMs)          | 0.0304223   | 0.450487834 | 0.2383063  | 0.15768726 | 0.7741984  | 0.12388085 | 0.19945078 |
|                                      |                                     | Cytokine-cytokine receptor interaction  | 0.0065022   | 0.739618116 | 0.79173    | 0.86200225 | 0.36043497 | 0.00864035 | 0.04210011 |
|                                      |                                     | ECM-receptor interaction                | 0.0375566   | 0.000338015 | 0.0402435  | 0.00053073 | 0.09808704 | 0.00140553 | 0.00566799 |
|                                      |                                     | Neuroactive ligand-receptor interaction | 0.9999997   | 0.973466563 | 0.997506   | 0.95112038 | 0.99954736 | 0.96538516 | 0.99999949 |
| Cellular Processes                   | Cell Communication                  | Adherens junction                       | 0.0075503   | 0.000350679 | 0.0723646  | 1.2472E-08 | 0.00401871 | 7.172E-05  | 0.01402062 |
|                                      |                                     | Focal adhesion                          | 9.955E-07   | 8.7584E-10  | 4.463E-07  | 4.1196E-12 | 1.9084E-07 | 2.0365E-06 | 7.2735E-07 |
|                                      |                                     | Gap junction                            | 0.3448553   | 0.002275947 | 0.2516694  | 0.00025787 | 0.70487626 | 0.03104375 | 0.49194213 |
|                                      |                                     | Tight junction                          | 0.4380605   | 0.010125141 | 0.0691094  | 0.00120049 | 0.78735902 | 0.02162008 | 0.41644951 |

|                          |                                  |                                           |                                    |             |            |            |            |            |            |            |
|--------------------------|----------------------------------|-------------------------------------------|------------------------------------|-------------|------------|------------|------------|------------|------------|------------|
|                          | Cell Growth and Death            | Apoptosis                                 | 0.0882777                          | 0.726717786 | 0.8514449  | 0.00956359 | 0.68559935 | 0.15275183 | 0.746748   |            |
|                          |                                  | Cell cycle                                | 0.3098195                          | 0.015562841 | 0.1992744  | 0.02121993 | 0.3048835  | 0.03018412 | 0.31644053 |            |
|                          |                                  | Oocyte meiosis                            | 0.9121378                          | 0.003122052 | 0.2421787  | 1.9531E-05 | 0.18423977 | 0.00067228 | 0.62602013 |            |
|                          |                                  | p53 signaling pathway                     | 0.435183                           | 0.050004703 | 0.2603295  | 0.00670619 | 0.15657617 | 0.0135151  | 0.20432311 |            |
|                          | Cell Motility                    | Regulation of actin cytoskeleton          | 0.0057287                          | 3.55766E-06 | 1.805E-05  | 1.8053E-12 | 7.9426E-06 | 7.5121E-08 | 0.0002864  |            |
|                          | Transport and Catabolism         | Endocytosis                               | 0.0711887                          | 3.00916E-06 | 0.0227307  | 5.0149E-11 | 0.00418808 | 6.2378E-06 | 0.01661282 |            |
|                          |                                  | Lysosome                                  | 0.2077767                          | 0.624321399 | 0.8310009  | 0.14309702 | 0.36135972 | 0.91745848 | 0.23385201 |            |
|                          |                                  | Regulation of autophagy                   | 0.9965532                          | 0.87192699  | NA         | 0.93872653 | 0.90801792 | 0.96479057 | NA         |            |
|                          | Organismal Systems               | Circulatory System                        | Cardiac muscle contraction         | 0.9127193   | 0.65247628 | 0.5773296  | 0.96933145 | 0.96851291 | 0.89317852 | 0.98450256 |
|                          |                                  |                                           | Vascular smooth muscle contraction | 0.0221258   | 0.06309534 | 0.0631106  | 0.00142677 | 0.06227142 | 0.08094742 | 0.06930892 |
| Development              |                                  | Axon guidance                             | 0.3658191                          | 1.82268E-14 | 0.000353   | 1.6545E-11 | 0.02105085 | 1.6506E-12 | 0.06803939 |            |
|                          |                                  | Dorso-ventral axis formation              | 0.5239334                          | 0.406452011 | 0.2467852  | 0.00567038 | 0.22394222 | 0.10850217 | 0.43820916 |            |
| Endocrine System         |                                  | Adipocytokine signaling pathway           | 0.4148339                          | 0.001031577 | 0.4741344  | 6.8834E-05 | 0.0704503  | 0.00033494 | 0.31595315 |            |
|                          |                                  | GnRH signaling pathway                    | 0.7199286                          | 0.000669023 | 0.5183442  | 9.6316E-05 | 0.78131945 | 0.03504321 | 0.47417146 |            |
|                          |                                  | Insulin signaling pathway                 | 0.3590868                          | 0.000274884 | 0.0717166  | 1.3172E-05 | 0.05823813 | 0.00010169 | 0.4277422  |            |
|                          |                                  | Melanogenesis                             | 0.891154                           | 4.70945E-08 | 0.5264305  | 5.6048E-07 | 0.47726998 | 0.00038001 | 0.62451647 |            |
|                          |                                  | PPAR signaling pathway                    | 0.7197313                          | 0.781583062 | 0.4937822  | 0.8197549  | 0.47801977 | 0.46234552 | 0.50251883 |            |
|                          |                                  | Progesterone-mediated oocyte maturation   | 0.9552766                          | 0.147258613 | 0.6439742  | 0.0075539  | 0.50098285 | 0.05588655 | 0.92770052 |            |
| Renin-angiotensin system |                                  | 0.744691                                  | NA                                 | NA          | 0.8717646  | 0.68552883 | 0.7881019  | 0.82189913 |            |            |
| Environmental Adaptation |                                  | Circadian rhythm                          | 0.5983604                          | 0.000196309 | 0.085714   | 0.00893816 | 0.58699641 | 0.02178893 | 0.36085283 |            |
| Excretory System         |                                  | Aldosterone-regulated sodium reabsorption | 0.2601385                          | 0.322686333 | 0.2047037  | 0.00227351 | 0.04921977 | 0.0795628  | 0.36076854 |            |
| Immune System            |                                  | Antigen processing and presentation       | 0.1029432                          | 0.99978364  | 0.9614344  | 0.99997803 | 0.64457579 | 0.99821961 | 0.17186944 |            |
|                          |                                  | B cell receptor signaling pathway         | 0.1398929                          | 0.180742568 | 0.5504305  | 0.03542911 | 0.05554549 | 0.16501933 | 0.59383183 |            |
|                          |                                  | Chemokine signaling pathway               | 0.0096608                          | 0.014004786 | 0.1757481  | 0.00033376 | 0.01034982 | 0.00539078 | 0.02020896 |            |
|                          |                                  | Complement and coagulation cascades       | 0.7197313                          | 0.999375463 | NA         | 0.99969994 | 0.9910901  | 0.94547402 | 0.96859155 |            |
|                          | Cytosolic DNA-sensing pathway    | 0.7322961                                 | 0.998182262                        | NA          | 0.99079218 | NA         | 0.97266548 | 0.91094728 |            |            |
|                          | Fc epsilon RI signaling pathway  | 0.2665985                                 | 0.102469157                        | 0.5773296   | 0.00078471 | 0.06807797 | 0.10104242 | 0.48203998 |            |            |
|                          | Fc gamma R-mediated phagocytosis | 0.2426728                                 | 0.006730518                        | 0.2960199   | 1.9333E-06 | 0.02072694 | 0.00118922 | 0.30594341 |            |            |

|                |                |                                              |                                                        |             |             |            |            |            |            |           |
|----------------|----------------|----------------------------------------------|--------------------------------------------------------|-------------|-------------|------------|------------|------------|------------|-----------|
|                |                | Hematopoietic cell lineage                   | 0.295193                                               | 0.977429453 | 0.9657507   | 0.88827216 | 0.98027765 | 0.05588655 | 0.44965596 |           |
|                |                | Intestinal immune network for IgA production | 0.3025375                                              | 0.954142698 | NA          | 0.93458111 | 0.96475465 | 0.37117205 | 0.33233329 |           |
|                |                | Leukocyte transendothelial migration         | 0.0129862                                              | 0.110471074 | 0.0140559   | 0.00569311 | 0.02165608 | 0.12876412 | 0.0168581  |           |
|                |                | Natural killer cell mediated cytotoxicity    | 0.2497848                                              | 0.975298846 | 0.8894145   | 0.97023719 | 0.78085159 | 0.89148856 | 0.90614911 |           |
|                |                | NOD-like receptor signaling pathway          | 0.0011909                                              | 0.276759293 | 0.086417    | 0.51870423 | 0.10989388 | 0.20905455 | 0.0052846  |           |
|                |                | RIG-I-like receptor signaling pathway        | 0.4957657                                              | 0.814297673 | 0.7610337   | 0.32372772 | 0.85501597 | 0.56521771 | 0.69281814 |           |
|                |                | T cell receptor signaling pathway            | 0.7562246                                              | 0.008016051 | 0.5960581   | 5.6559E-07 | 0.27760697 | 0.00027482 | 0.83062314 |           |
|                |                | Toll-like receptor signaling pathway         | 0.2399534                                              | 0.508093121 | 0.5424058   | 0.35235921 | 0.66026121 | 0.87887546 | 0.77081459 |           |
|                | Nervous System | Long-term depression                         | 0.3281182                                              | 0.097259743 | 0.7468893   | 0.00880999 | 0.47801977 | 0.00519551 | 0.21647774 |           |
|                |                | Long-term potentiation                       | 0.8152479                                              | 2.47945E-05 | 0.2603295   | 1.1061E-07 | 0.46505319 | 2.8417E-05 | 0.65139088 |           |
|                |                | Neurotrophin signaling pathway               | 0.1028205                                              | 2.55899E-07 | 0.0073249   | 5.1881E-14 | 0.01510896 | 1.7766E-06 | 0.13793821 |           |
|                | Sensory System | Olfactory transduction                       | NA                                                     | 1           | NA          | 1          | NA         | 1          | NA         |           |
|                |                | Taste transduction                           | NA                                                     | 0.989102986 | NA          | 0.9971749  | NA         | 0.99832142 | NA         |           |
| Human Diseases | Cancers        | Acute myeloid leukemia                       | 0.3614365                                              | 0.008836168 | 0.1791375   | 1.9246E-06 | 0.08357276 | 0.07879201 | 0.49183333 |           |
|                |                | Basal cell carcinoma                         | 0.928799                                               | 0.00450669  | 0.8836407   | 4.4334E-05 | 0.492517   | 0.14253932 | 0.91094728 |           |
|                |                | Bladder cancer                               | 0.0395284                                              | 0.071761912 | 0.2147159   | 0.01890844 | 0.29665409 | 0.18250788 | 0.21361571 |           |
|                |                | Chronic myeloid leukemia                     | 0.2194776                                              | 0.000521101 | 0.1570074   | 1.2941E-08 | 0.05554549 | 0.0041198  | 0.29455148 |           |
|                |                | Colorectal cancer                            | 0.0668489                                              | 2.2991E-06  | 0.0402435   | 5.5246E-09 | 0.002977   | 0.00290768 | 0.18180411 |           |
|                |                | Endometrial cancer                           | 0.8083143                                              | 0.025985764 | 0.8690741   | 8.9546E-05 | 0.67383017 | 0.44124536 | 0.99499327 |           |
|                |                | Glioma                                       | 0.6099619                                              | 0.005219077 | 0.433862    | 2.3849E-07 | 0.23097475 | 0.04501964 | 0.73966332 |           |
|                |                | Melanoma                                     | 0.4957657                                              | 0.042876434 | 0.2860197   | 0.00014299 | 0.18284592 | 0.03863662 | 0.53380234 |           |
|                |                | Non-small cell lung cancer                   | 0.8363935                                              | 0.03714777  | 0.8789738   | 2.5997E-05 | 0.69872371 | 0.17088388 | 0.97215683 |           |
|                |                | Pancreatic cancer                            | 0.2697612                                              | 0.000236643 | 0.0555982   | 1.1153E-05 | 0.04461884 | 0.00923889 | 0.39126895 |           |
|                |                | Pathways in cancer                           | 9.995E-07                                              | 7.72089E-15 | 1.43E-08    | 1.0844E-24 | 2.0888E-08 | 1.0609E-12 | 7.4017E-08 |           |
|                |                | Prostate cancer                              | 0.2453521                                              | 0.001056823 | 0.4430297   | 9.1293E-09 | 0.06521889 | 0.00070344 | 0.35332166 |           |
|                |                | Renal cell carcinoma                         | 0.012183                                               | 1.52755E-06 | 0.0012304   | 2.7703E-08 | 0.00176105 | 4.0375E-05 | 0.00602412 |           |
|                |                | Small cell lung cancer                       | 0.0046861                                              | 5.3057E-05  | 0.0003037   | 5.5246E-09 | 0.00099633 | 0.00140553 | 0.01317236 |           |
|                | Thyroid cancer | 0.828963                                     | 0.056069596                                            | NA          | 0.00039522  | 0.86136243 | 0.03159751 | 0.94750356 |            |           |
|                |                | Cardiovascular Diseases                      | Arrhythmogenic right ventricular cardiomyopathy (ARVC) | 0.4631528   | 3.78622E-05 | 0.3295531  | 0.00192625 | 0.56530264 | 0.09511073 | 0.1926222 |
|                |                |                                              | Dilated cardiomyopathy                                 | 0.3960538   | 0.0040041   | 0.2736494  | 0.01626201 | 0.8638423  | 0.00939212 | 0.1717675 |

|                            |                                                            |           |             |           |            |            |            |            |
|----------------------------|------------------------------------------------------------|-----------|-------------|-----------|------------|------------|------------|------------|
|                            | Hypertrophic cardiomyopathy (HCM)                          | 0.3870356 | 0.000991134 | 0.1045814 | 0.03222358 | 0.81935933 | 0.04276553 | 0.19200117 |
|                            | Viral myocarditis                                          | 0.0011177 | 0.610292151 | 0.513064  | 0.85900863 | 0.50362778 | 0.65664305 | 0.14150089 |
| Immune System Diseases     | Allograft rejection                                        | 0.1571998 | 0.986596064 | NA        | 0.89755203 | NA         | 0.3521654  | 0.87485135 |
|                            | Asthma                                                     | 0.1294083 | 0.998723204 | NA        | 0.95632634 | 0.86136243 | 0.51555917 | 0.30405525 |
|                            | Autoimmune thyroid disease                                 | 0.4977123 | 0.999202443 | NA        | 0.99878035 | NA         | 0.98733125 | 0.9639561  |
|                            | Graft-versus-host disease                                  | 0.1157606 | 0.992237035 | NA        | 0.99688976 | NA         | 0.43368342 | 0.52640705 |
|                            | Primary immunodeficiency                                   | 0.614037  | 0.999680068 | NA        | 0.93872653 | 0.90801792 | 0.98431873 | 0.9715315  |
|                            | Systemic lupus erythematosus                               | 0.4043481 | 0.999997643 | NA        | 0.99999029 | 0.96300116 | 0.98542253 | 0.98925282 |
| Infectious Diseases        | Epithelial cell signaling in Helicobacter pylori infection | 0.8152479 | 0.027273025 | 0.2603295 | 0.01303399 | 0.66218451 | 0.04373349 | 0.65139088 |
|                            | Pathogenic Escherichia coli infection                      | 0.3402992 | 0.380769215 | 0.1715387 | 0.16515094 | 0.3191219  | 0.31132468 | 0.6544757  |
|                            | Vibrio cholerae infection                                  | 0.6100163 | 0.737214551 | 0.8881285 | 0.14130825 | 0.97820527 | 0.02215317 | 0.45694259 |
| Metabolic Diseases         | Maturity onset diabetes of the young                       | 0.9825058 | 0.602602989 | NA        | 0.18023522 | NA         | 0.78278205 | NA         |
|                            | Type I diabetes mellitus                                   | 0.163556  | 0.982774633 | NA        | 0.96971918 | NA         | 0.11109846 | 0.78461105 |
|                            | Type II diabetes mellitus                                  | 0.1521473 | 0.083523109 | 0.2660992 | 0.00908693 | 0.08501119 | 0.17136383 | 0.16179571 |
| Neurodegenerative Diseases | Alzheimer's disease                                        | 0.3048037 | 0.992706367 | 0.8763121 | 0.98011127 | 0.63660083 | 0.83651915 | 0.71662427 |
|                            | Amyotrophic lateral sclerosis (ALS)                        | 0.5440286 | 0.031199375 | 0.3293427 | 0.01289052 | 0.46331657 | 0.02510449 | 0.40367693 |
|                            | Huntington's disease                                       | 0.6033852 | 0.977428582 | 0.3806216 | 0.99500188 | 0.8466651  | 0.78930485 | 0.89768033 |
|                            | Parkinson's disease                                        | 0.9889915 | 0.999999993 | 0.9935487 | 0.99999999 | 0.99847202 | 0.99905861 | 0.99997055 |
|                            | Prion diseases                                             | 0.787815  | 0.87192699  | NA        | 0.52086642 | NA         | 0.05419744 | 0.86448595 |

|                 |  |
|-----------------|--|
| P>0.05          |  |
| 0.0005<=P<=0.05 |  |
| P<0.0005        |  |

\* Pathway enrichment analysis was performed in DAVID

\* Multiple testing correction was not applied

**A.**

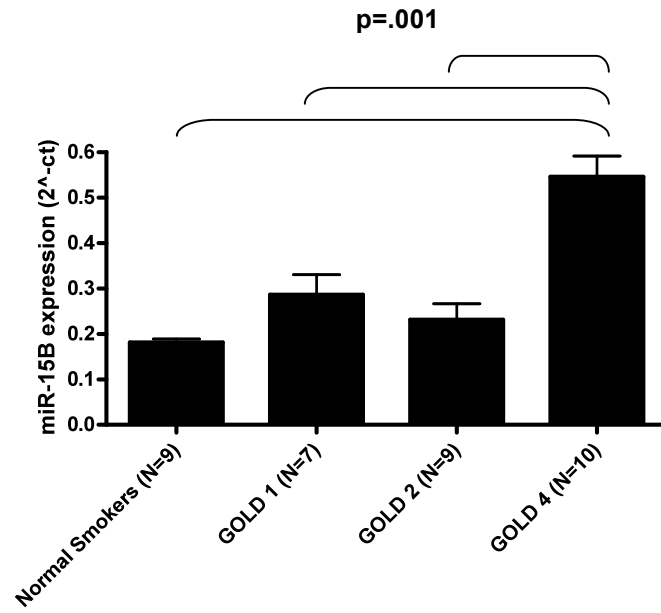

**B.**

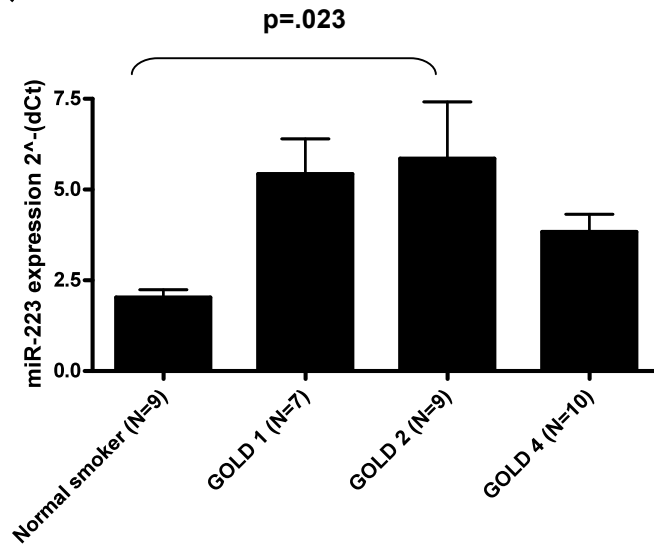

Supplemental Figure E1
